# Supplementary material
Source: HighWire-hosted journal article supplement (https://www.rcpjournals.org/highwire/filestream/7166/field_highwire_adjunct_files/0/CMJ1601-cocker-errata.pdf)
Supplement: CMJ1601-cocker-errata.pdf [file CMJ1601-cocker-errata.pdf]

## Clinical and scientific letters: On-going lessons in fluid prescription: assessment of adherence to weight-based intravenous fluid prescribing in medical inpatients

DEREK COCKER

*Specialist registrar, Tropical Infectious Diseases Unit, Royal Liverpool University Hospital, Liverpool, UK*

DEREK SLOAN

*Consultant, Tropical Infectious Diseases Unit, Royal Liverpool University Hospital, Liverpool, UK; consultant, Liverpool School of Tropical Medicine, Liverpool, UK; and consultant, Liverpool Heart and Chest Hospital, Liverpool, UK*

FFION CARLIN

*Senior house officer, Tropical Infectious Diseases Unit, Royal Liverpool University Hospital, Liverpool, UK*

EILEEN MARKS

*Consultant, Department of Clinical Biochemistry and Metabolic Medicine, Royal Liverpool University Hospital, Liverpool, UK*

MICHAEL BEADSWORTH

*Consultant, Tropical Infectious Diseases Unit, Royal Liverpool University Hospital, Liverpool, UK*

*Clinical Medicine 2015;15;503–4*

Derek Sloan's name was submitted with incorrect spelling. The correct spelling is printed above.
